1 The membrane-proximal domain of the periplasmic adapter  
2 protein plays a role in vetting substrates utilising channels 1  
3 and 2 of RND efflux transporters

4

5 Ilyas Alav<sup>a</sup>, Vassiliy N. Bavro<sup>b#</sup>, Jessica M. A. Blair<sup>a#</sup>

6

7 <sup>a</sup>Institute of Microbiology and Infection, College of Medical and Dental Sciences,  
8 University of Birmingham, Birmingham, United Kingdom

9 <sup>b</sup>School of Life Sciences, University of Essex, Colchester, United Kingdom

10

11 #Address correspondence to:

12 Vassiliy N Bavro, [v.bavro@essex.ac.uk](mailto:v.bavro@essex.ac.uk)

13 Jessica M A Blair, [j.m.a.blair@bham.ac.uk](mailto:j.m.a.blair@bham.ac.uk)

14

15 **Running title:** PAP controls access to RND substrate channels

16

17

18

19

20

21

22

23

24

## 25 **Abstract**

26 Active efflux by resistance-nodulation-division (RND) efflux pumps is a major  
27 contributor to antibiotic resistance in clinically relevant Gram-negative bacteria.  
28 Tripartite RND pumps, such as AcrAB-TolC of *Salmonella enterica* serovar  
29 Typhimurium, comprise of an inner membrane RND transporter, a periplasmic adaptor  
30 protein (PAP) and an outer membrane factor. Previously, we elucidated binding sites  
31 within the PAP AcrA (termed binding boxes) that were important for AcrB-transporter  
32 recognition. Here, we have refined the binding box model by identifying the most  
33 critical residues involved in PAP-RND binding and show that the corresponding RND-  
34 binding residues in the closely related PAP AcrE are also important for AcrB  
35 interactions. In addition, our analysis identified a membrane-proximal domain (MPD)-  
36 residue in AcrA (K366), that when mutated, differentially affects transport of substrates  
37 utilising different AcrB efflux-channels, namely channels 1 and 2, supporting a  
38 potential role for the PAP in sensing the substrate-occupied state of the proximal  
39 binding pocket (PBP) of the transporter and substrate vetting. Our model predicts that  
40 there is a close interplay between the MPD of the PAP and the RND transporter in the  
41 productive export of substrates utilising the PBP.

42

## 43 **Importance**

44 Antibiotic resistance greatly threatens our ability to treat infectious diseases. In Gram-  
45 negative bacteria, overexpression of tripartite efflux pumps, such as AcrAB-TolC,  
46 contributes to multidrug resistance because they export many different classes of  
47 antibiotics. The AcrAB-TolC pump is made up of three components: the periplasmic  
48 adaptor protein (PAP) AcrA, the RND-transporter AcrB, and the outer-membrane  
49 factor TolC. Here, we identified critical residues of AcrA that are important for its

50 function with AcrB in *Salmonella enterica* serovar Typhimurium. Also, we show that  
51 AcrA shares these critical residues with AcrE, a closely related PAP, explaining their  
52 interoperability with AcrB. Importantly, we identified a residue in the membrane-  
53 proximal domain of AcrA that when mutated affected how different substrates access  
54 AcrB and impacted downstream efflux *via* TolC channel. Understanding the role that  
55 PAPs play in the assembly and function of tripartite RND pumps can guide novel ways  
56 to inhibit their function to combat antibiotic resistance.

57

## 58 **Introduction**

59 Antibiotic resistance is one of the greatest global public health challenges and  
60 threatens our ability to effectively treat and prevent infectious diseases (1). In clinical  
61 isolates of Gram-negative bacteria, the Resistance-Nodulation-Division (RND) family  
62 of efflux pumps are frequently upregulated and associated with multidrug resistant  
63 phenotypes (2-6). Tripartite RND pumps span the double membrane of Gram-negative  
64 bacteria and consist of an inner membrane RND transporter, a periplasmic adaptor  
65 protein (PAP), and an outer membrane factor (OMF) (7, 8). The AcrAB-TolC pump is  
66 the principal RND efflux system in Enterobacteriaceae, including *Salmonella enterica*.  
67 It can export a wide range of structurally different compounds, including clinically  
68 relevant antibiotics such as  $\beta$ -lactams and fluoroquinolones (9, 10).

69

70 Gram-negative bacteria encode a wide repertoire of RND transporters, which typically  
71 pair with a single cognate PAP and an OMF to form tripartite pumps that have varied  
72 substrate specificities and physiological roles (10-16). The *S. enterica* genome  
73 encodes five RND pumps: AcrAB-TolC, AcrEF-TolC, AcrAD-TolC, MdtABC, and  
74 MdsABC (10). The AcrEF-TolC pump possesses a similar substrate profile to AcrAB-

75 TolC, but its expression is silenced by H-NS under laboratory conditions (17). The  
76 PAPs comprise four domains:  $\alpha$ -helical domain, lipoyl domain,  $\beta$ -barrel domain and  
77 the membrane-proximal domain (MPD) (18). The  $\alpha$ -helical domain has a coiled-coil  
78 arrangement and appears to interact with the  $\alpha$ -barrel domain of the OMF (18, 19).  
79 The lipoyl domain is involved in stabilising the self-assembly of the PAPs within the  
80 tripartite efflux pump. The  $\beta$ -barrel domain is flexibly linked to the MPD, and both  
81 domains appear to interact with the porter domain of the RND-transporter (20). The  
82 MPD of RND-associated PAPs is critical for the assembly and function of AcrAB-TolC  
83 in *E. coli* and *S. enterica* (21, 22). In the PAPs ZneB and CusB of the tripartite ZneCAB  
84 and CusABC RND efflux pumps, respectively, the MPD appears to play an important  
85 role in substrate acquisition and presentation to the metal pumping RND transporters  
86 (23, 24). Additionally, in the related ABC-transporter-associated PAP MacA, the MPD  
87 has been demonstrated to be involved in direct binding of possible pump substrates  
88 (25) and has been suggested to be involved in substrate vetting (18).

89

90 Previous studies have shown that AcrA and AcrE are interchangeable in *S. enterica*  
91 (24-26), whereas MdtA and MdsA can only function with their cognate RND-  
92 transporters (22). Previously, we showed that the regions of PAP-transporter contact  
93 are relatively compact and discrete. Based on homology models of the PAPs  
94 in *Salmonella*, we found these regions to be highly conserved between AcrA and AcrE,  
95 while differing significantly between divergent PAPs, such as MdtA and MdsA,  
96 providing a possible explanation of the observed interoperability of AcrA and AcrE.  
97 The 3D RND-interaction sites can be delineated into discrete linear sequences, which  
98 we have dubbed “binding boxes”, that map to the  $\beta$ -barrel domain (boxes 1–5) and the  
99 MPD (6–9). Disruption of a few key residues within the binding boxes 1 and 4-6

100 mapping to the exposed  $\beta$ -barrel loops and the MPD, abrogated transport, suggesting  
101 an important role for this region in AcrB-binding (22).

102

103 Here, we set out to further validate the “binding boxes” model of PAP-RND interaction  
104 by phenotypic profiling of site-directed mutants targeting the  $\beta$ -barrel and  
105 membrane-proximal domains. We specifically sought to describe the efflux profiles of  
106 substrates that have been suggested to utilise different AcrB-efflux channels (26-28).

107

## 108 **Results**

### 109 **Refining the binding box model of PAP-RND interactions**

110 Previously, using disruptive site-directed mutagenesis (SDM), we demonstrated that  
111 discrete stretches of residues, which we dubbed “binding boxes” based on their spacial  
112 proximity (19, 20, 29, 30), control PAP-RND complex formation and recognition of  
113 cognate PAP-RND pairs (22). Here, we set out to refine our binding box model by  
114 generating and testing the effects of more subtle and conservative mutations to identify  
115 the PAP-residues most critical for RND-binding (Fig. 1). Specifically, residues which  
116 were previously shown to be important for RND-binding (22) were mutated to residues  
117 with similar properties to produce conservative mutations, while residues, the previous  
118 mutation of which led to limited functional impact were subjected to more disruptive  
119 mutagenesis. Mutated versions of AcrA were expressed in the *Salmonella* SL1344  
120  $\Delta$ 4PAP strain, which lacks all four known RND-associated PAPs (AcrA, AcrE, MdtA  
121 and MdsA) (22). The effects of the mutations on efflux function were assessed using  
122 ethidium bromide efflux assays and antimicrobial susceptibility testing.

123

124 The PAPs reside in the periplasm and are embedded in the plasma membrane by a  
125 lipid anchor and/or a transmembrane helix and are composed of several well-defined  
126 domains (18, 31). From the plasma membrane outward, these are the  
127 membrane-proximal domain (containing boxes 6-9), the  $\beta$ -barrel domain (containing  
128 boxes 1-5), the lipoyl domain, and the  $\alpha$ -hairpin domain (18). The G58F mutant  
129 mapping to box 1 was previously shown to impair efflux function (22). Here, the R59A  
130 mutant was produced to investigate whether other residues in proximity to box 1 had  
131 a role in RND-binding. The R59A mutant caused an intermediate impairment of efflux  
132 function, between that of the  $\Delta$ 4PAP and the WT complement strain, confirming the  
133 important role of box 1 (Fig. 2 and Table S2). Residues which were mutated as pairs  
134 in our previous study were separated to identify the most critical residue. The T270F-  
135 T271F mutant mapping to box 4 was separated into T270D and T271D for disruptive  
136 mutagenesis, and T270A and T271A mutants as more subtle mutations. The T271D  
137 mutant significantly impaired efflux, whilst the T270D mutant had no effect.  
138 Furthermore, the T271A mutation still caused a mild impairment of efflux function (Fig.  
139 2 and Table S2), suggesting that T271 is a critical residue in efflux function. The  
140 G272P-S273P mutant mapping to box 4 previously impaired efflux function, therefore,  
141 a more conservative mutation was produced to determine the role of G272-S273. The  
142 G272A-S273A mutant had no effect on efflux activity, indicating that these residues  
143 can tolerate neutral mutations (Fig. 2 and Table S2). The F292G mutant mapping to  
144 box 5 was previously shown to affect both AcrB- and AcrD-binding (22, 32). Hence,  
145 the F292V mutant was produced to determine whether a more subtle change would  
146 still affect efflux function. Like the F292G phenotype, the F292V mutant also resulted  
147 in significantly abrogated efflux (Fig. 2 and Table S2), indicating that F292 is critical  
148 for efflux function. The Q310F mutant mapping to box 6 was previously shown to have

149 no impact on efflux function, and the Q311F reported here, similarly did not influence  
150 efflux function detectably (Fig. 2 and Table S2). Therefore, both residues were  
151 simultaneously mutated into Q310P-Q311P, which resulted in significant impairment  
152 of efflux function, indicating that double glutamine residues may provide some  
153 functional redundancy and that the presence of a glutamine residue may be critical in  
154 this position (Fig. 2 and Table S2).

155

156 Mutations mapping to box 6, including R315F and R318A, were previously shown to  
157 have no impact on efflux function. Therefore, several novel mutations mapping to box  
158 6 were produced (P317G, P317F and R318F), which did not have any impact on efflux  
159 function (Fig. 2 and Table S2). Novel mutations mapping to box 8 (I344F-G344F and  
160 K346A) also had no observable influence on efflux function (Fig. 2 and Table S2).  
161 G363 in box 9 was shown by us and other studies to be critical for efflux function (22,  
162 32, 33). Further mutations in box 9 were produced to investigate whether other  
163 residues also play a role in RND-binding. However, Q365F, K366D, R368F and R368A  
164 had no effect on efflux function, suggesting that only G363 is critical for efflux function  
165 (Fig. 2 and Table S2). Western blotting verified that the observed effects of the mutants  
166 with impaired efflux were not due to changes in protein expression levels or stability  
167 (Fig. S1A).

168

169

170

171

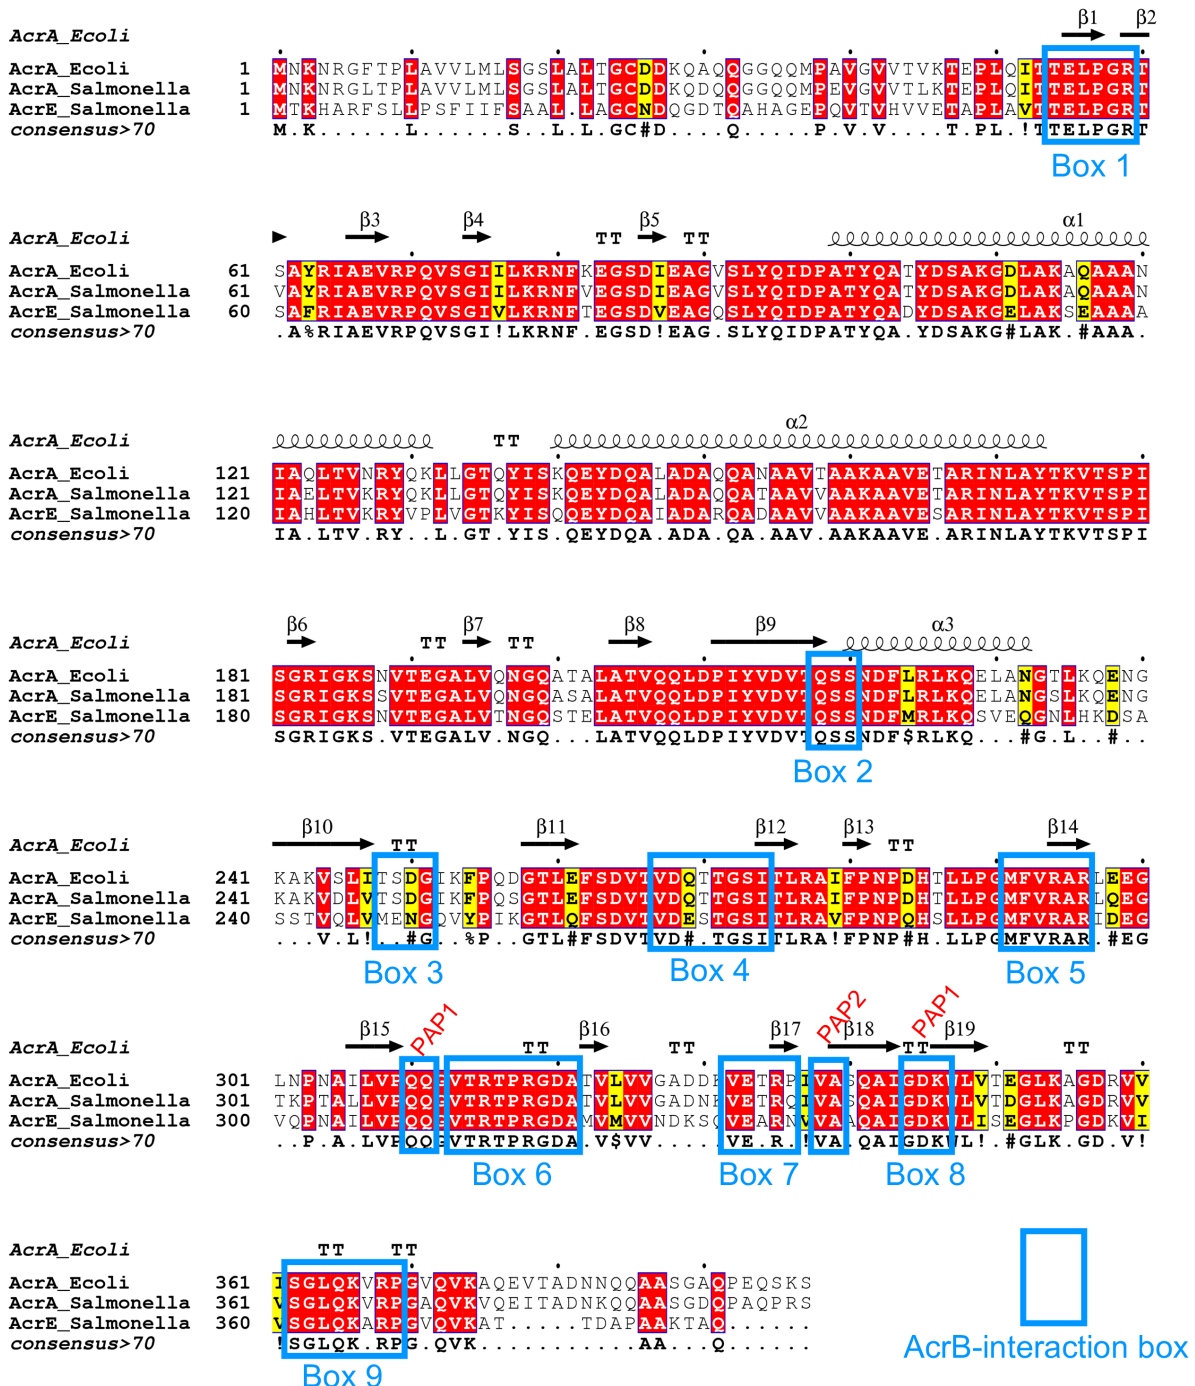

172 **Figure 1.** Multiple sequence alignment of *Salmonella* AcrA and AcrE combined with  
 173 the mapping of the secondary structure derived from the experimentally defined  
 174 structure of *E. coli* AcrA (PDB 5V5S, chain G) (20). Identical residues are coloured red  
 175 and similar residues are coloured yellow. The PAP-binding boxes implicated in RND-  
 176 binding (22) are numbered 1 to 9 and depicted using blue rectangles. Figure created  
 177 using Esript 3.0 (34).



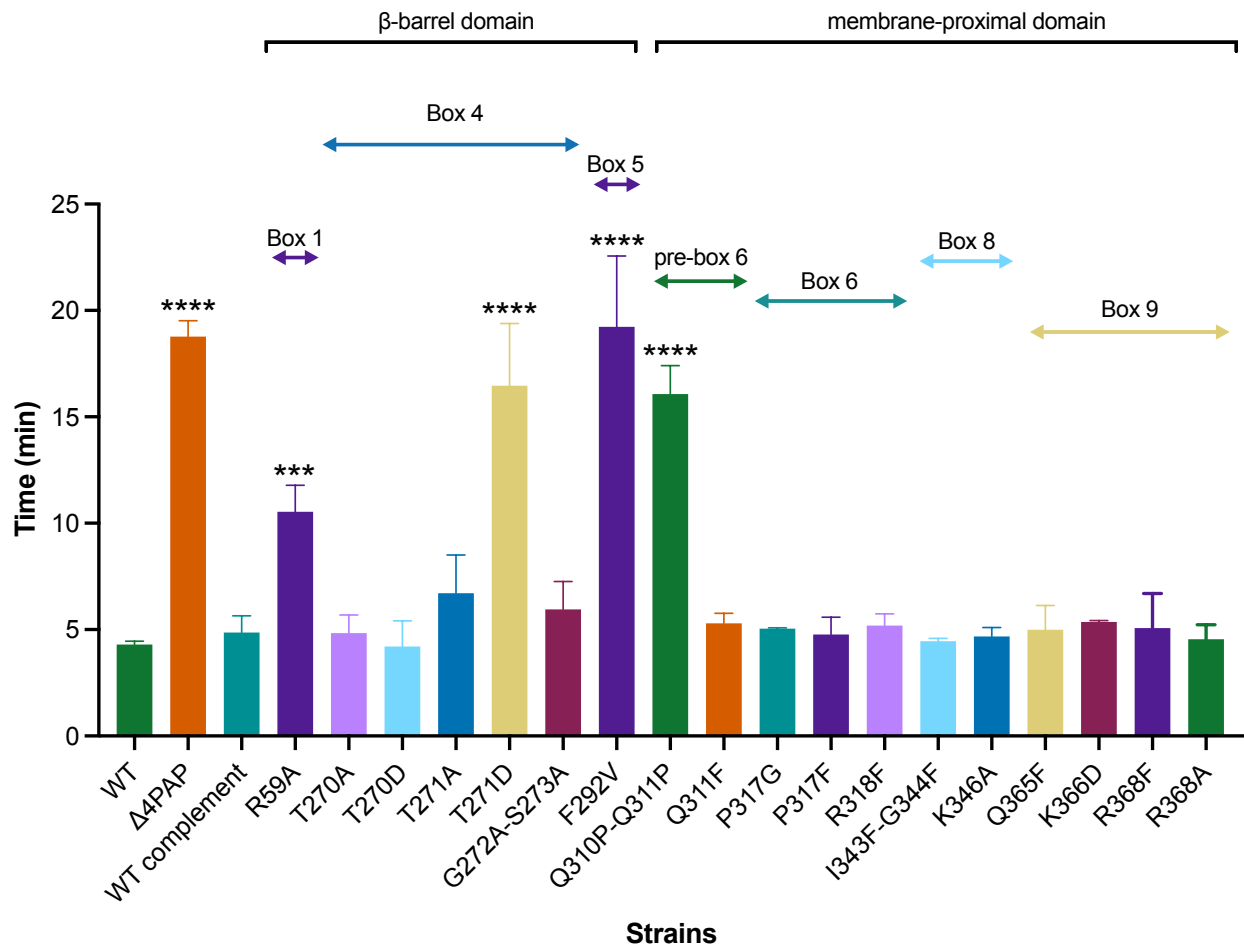

178

179 **Figure 2. Efflux of ethidium bromide by the  $\Delta 4PAP$  strain complemented with**  
 180 **mutated versions of AcrA.** Data presented are the mean of three biological replicates  
 181 and are shown as the time taken for the fluorescence to decrease by 25% +/- SD.  
 182 Bacteria were treated with ethidium bromide and the proton-motive force dissipator  
 183 CCCP for 1 hour and then re-energised with glucose. Annotation above indicates the  
 184 mapping of each mutation to its binding box, as well as the domain mapping of  
 185 respective boxes. Data were analysed by one-way ANOVA and compared to the WT  
 186 complement using Dunnett's test. Significantly different strains are denoted with \*\*\* ( $P$   
 187  $\leq 0.001$ ) or \*\*\*\* ( $P \leq 0.0001$ ).

188

189

190 **AcrE and AcrA share conserved binding boxes that are responsible for their**  
191 **interoperability relative to AcrB**

192 The binding boxes between AcrA and AcrE were previously shown to be highly  
193 conserved in *Salmonella* Typhimurium (Fig. 1), potentially explaining the observed  
194 interchangeability between the two PAPs (22). To validate their functional role in AcrE,  
195 SDM was used to mutate the residues, corresponding to the most critical binding box  
196 residues previously identified in AcrA (22) - namely G57, R58, T270, F291, R293 and  
197 G362 (Fig. 1). The effect of the mutations was assessed by ethidium bromide  
198 accumulation assays and antimicrobial susceptibility testing in the  $\Delta$ 4PAP  $\Delta$ acrF strain  
199 (22). This strain lacks all four RND-associated PAPs and the cognate RND-transporter  
200 AcrF, thereby allowing the impact of AcrE mutations on AcrB-binding to be determined.  
201 All mutations corresponding to the critical residues of AcrA (AcrE G57F, R58A, T270D,  
202 F291G, R293F and G362F) also had a significant effect on efflux function and  
203 antimicrobial susceptibility (Fig. 3 and Table S3). Consistent with this, the mutation of  
204 phenotypically neutral residues in AcrA, corresponding to the AcrE T216F, K365D and  
205 R367D respectively, also had no impact on efflux function (Fig. 3 and Table S3). The  
206 observed effects of the mutations tested stemmed from their impact on the function of  
207 the protein and were not due to changes in expression levels or stability of the variant  
208 alleles, as validated by Western blotting, with a possible exception of G57F (Fig. S1B).

209

210

211

212

213

214

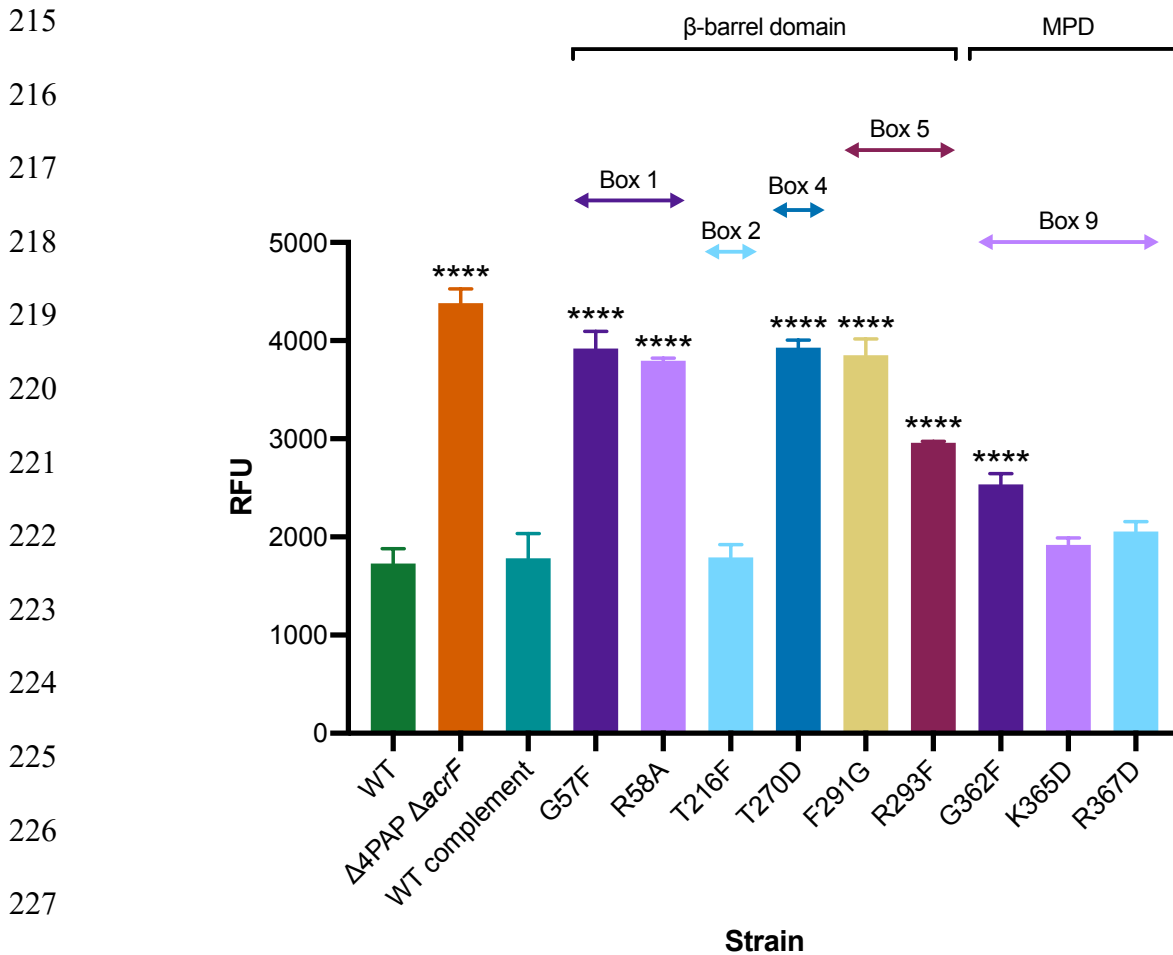

229 **Figure 3. Accumulation of ethidium bromide in  $\Delta 4\text{PAP } \Delta \text{acrF}$  strain**  
230 **complemented with mutated versions of AcrE.** Data represented are the mean of  
231 three biological replicates showing maximum RFU values after 30 min of ethidium  
232 bromide exposure +/- SD. Annotation above indicates the mapping of each mutation  
233 to its binding box, as well as the domain mapping of respective boxes. Data were  
234 analysed by one-way ANOVA and compared to the WT complement strain using  
235 Dunnett's test. Significantly different strains are indicated with \*\*\*\* ( $P \leq 0.0001$ ). MPD,  
236 membrane-proximal domain.

237

238 The above results confirm the conservation of function of the binding boxes between  
239 AcrA and AcrE, which explains their interoperability in conjunction with AcrB.

240 **Potential role for the membrane-proximal domain of AcrA in vetting substrate**  
241 **access to channel 1 and channel 2**

242 The refinement of the binding box model of PAP-RND interaction led to the discovery  
243 of an AcrA mutant with a peculiar phenotype. The K366D AcrA mutant mapping to box  
244 9 (Fig. 1), did not alter ethidium bromide efflux or susceptibility (Fig. 2), but showed a  
245 distinct antimicrobial susceptibility profile to other antimicrobials tested (Table S2).  
246 Notably, the K366D mutation in AcrA conferred differential effects depending on the  
247 physicochemical properties of the compounds tested. The K366D mutant displayed  
248 greater than two-fold reduction in MIC values to high-molecular-mass drugs (HMMDs),  
249 such as doxorubicin, erythromycin, fusidic acid and novobiocin ( $M > 500$  g/mol) and  
250 low-molecular-mass drugs (LMMDs), such as chloramphenicol, clindamycin, linezolid,  
251 and minocycline ( $M < 500$  g/mol), compared to WT AcrA complement. However, the  
252 K366D mutant had no impact on the MIC values for planar aromatic cations (PACs),  
253 including acriflavine, berberine, benzalkonium chloride, crystal violet, ethidium  
254 bromide, methylene blue and rhodamine 6G (Table 1).

255

256

257

258

259

260

261

262

263

264

265 **Table 1.** Antimicrobial susceptibility of  $\Delta$ 4PAP strain complemented with F292V,  
266 Q311F or K366D AcrA to drugs with different physicochemical characteristics.

| Strain        | MIC ( $\mu$ g/mL) |           |            |           |            |            |             |            |           |           |                 |           |            |            |            |
|---------------|-------------------|-----------|------------|-----------|------------|------------|-------------|------------|-----------|-----------|-----------------|-----------|------------|------------|------------|
|               | HMMDs             |           |            |           | LMMDs      |            |             |            | PACs      |           |                 |           |            |            |            |
|               | ERY               | DOX       | FA         | NOV       | CHL        | CLI        | MIN         | LZD        | ACR       | BZK       | BER             | CV        | EB         | MB         | R6G        |
| WT            | 128               | 1024      | 1024       | 512       | 4          | 512        | 2           | 512        | 256       | 64        | >1024           | 64        | 1024       | 1024       | 1024       |
| $\Delta$ 4PAP | 4                 | 2         | 8          | 2         | 0.5        | 4          | 0.25        | 16         | 16        | 4         | 128             | 2         | 16         | 8          | 4          |
| WT complement | <u>64</u>         | <u>64</u> | <u>256</u> | <u>64</u> | <u>4</u>   | <u>128</u> | <u>1</u>    | <u>128</u> | <u>64</u> | <u>32</u> | <u>&gt;1024</u> | <u>16</u> | <u>128</u> | <u>128</u> | <u>128</u> |
| F292V AcrA    | <b>4</b>          | <b>2</b>  | <b>8</b>   | <b>2</b>  | <b>0.5</b> | <b>4</b>   | <b>0.25</b> | <b>16</b>  | <b>16</b> | <b>4</b>  | <b>128</b>      | <b>2</b>  | <b>16</b>  | <b>8</b>   | <b>4</b>   |
| Q311F AcrA    | 64                | 64        | 256        | 64        | 4          | 128        | 1           | 128        | 64        | 32        | >1024           | 16        | 64         | 128        | 128        |
| K366D AcrA    | <b>16</b>         | <b>16</b> | <b>32</b>  | <b>16</b> | <b>1</b>   | <b>32</b>  | <b>0.25</b> | <b>16</b>  | 64        | 32        | >1024           | 16        | 64         | 128        | 64         |

267 Underlined values highlight values for the  $\Delta$ PAP strain complemented with wild-type  
268 AcrA. Bold values are at least >2-fold different than the parent strain. HMMDs, high-  
269 molecular-mass drugs; ERY, erythromycin; DOX, doxorubicin; FA, fusidic acid; NOV,  
270 novobiocin; LMMDs, low-molecular-mass drugs; CHL, chloramphenicol; CLI,  
271 clindamycin; MIN, minocycline; LZD, linezolid; PACs, planar aromatic cations; ACR,  
272 acriflavine; BZK, benzalkonium chloride; BER, berberine; CV, crystal violet; EB,  
273 ethidium bromide; MB, methylene blue; R6G, rhodamine 6G.

274  
275 Previous studies have associated molecular weight of the substrate-drugs with the  
276 preferred channel access and binding pocket validation by the RND-transporter (26-  
277 28, 35). The RND-transporter AcrB has multiple substrate entry channels identified,  
278 which are used by drugs depending on their physicochemical properties (26, 27, 36)  
279 (Fig 4). LMMDs have been proposed to preferentially enter through channel 1 (CH1),  
280 whilst HMMDs are thought to enter AcrB through channel 2 (CH2) (36-38). The cleft  
281 entrance of CH2 has been previously suggested to be impacted by the membrane-  
282 proximal domain (MPD) of AcrA (26). This is seen in cryo-EM structures of the AcrAB-

283 TolC complex, which show that AcrA interacts with the PC1 and PC2 subdomains of  
284 AcrB (19, 39). PACs on the other hand, are preferentially taken up through channel 3  
285 (CH3), which starts from the vestibule formed by the central cavity of the three AcrB  
286 protomers and leads directly to the deep binding pocket (DBP) (26). The entrance of  
287 the recently proposed channel 4 (CH4) is in the groove formed by TM1 and TM2 and  
288 leads to the DBP (40). The location of CH3 and CH4 within AcrB suggests that the  
289 MPD of AcrA should not have a direct steric impact on the drug access (Fig. 4).

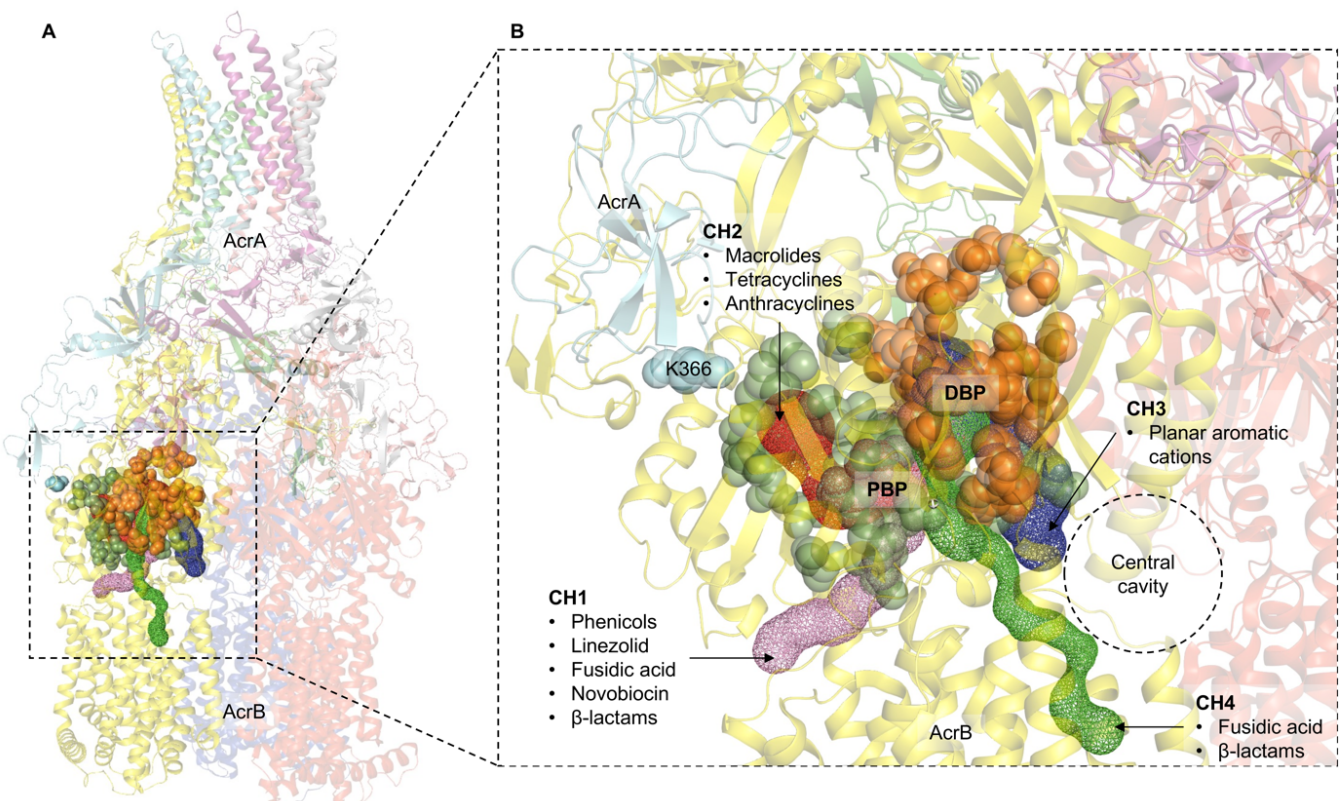

290 **Figure 4. A.** The crystal structure of the trimeric AcrB transporter and the hexameric  
291 AcrA assembly (TolC not shown for clarity). The different substrate entry pathways are  
292 shown as coloured channels, and the binding pockets are indicated by coloured  
293 spheres. **B.** Zoomed-in view of the substrate channels and the binding pockets relative  
294 to K366 of AcrA. The green and orange spheres correspond to the space-fill  
295 representation of the residues lining the proximal binding pocket (PBP) and the deep  
296 binding pocket (DBP), respectively. K366 is in the membrane-proximal domain of AcrA  
297 and impacts the residues lining the PBP and the entrance of channel 2 (CH2). Channel

298 1 (CH1) also feeds into the PBP, so is likely to be impacted by changes in K366.  
299 Channel 3 (CH3) starts from the central cavity and leads to the DBP. Similarly, channel  
300 4 (CH4) starts from the groove formed by TM1/TM2 and leads to the DBP. Therefore,  
301 CH3 and CH4 are unlikely to be directly impacted by K366 substitutions.  
302  
303 Therefore, to understand how the K366D AcrA mutation affects the susceptibility of  
304 the  $\Delta$ 4PAP strain to HMMDs and LMMDs, but not to PACs, we designed more specific  
305 antimicrobial sensitivity screens to be able to better differentiate the usage of the  
306 access channels by respective substrates and the impact of the K366D mutation on  
307 specific channels.

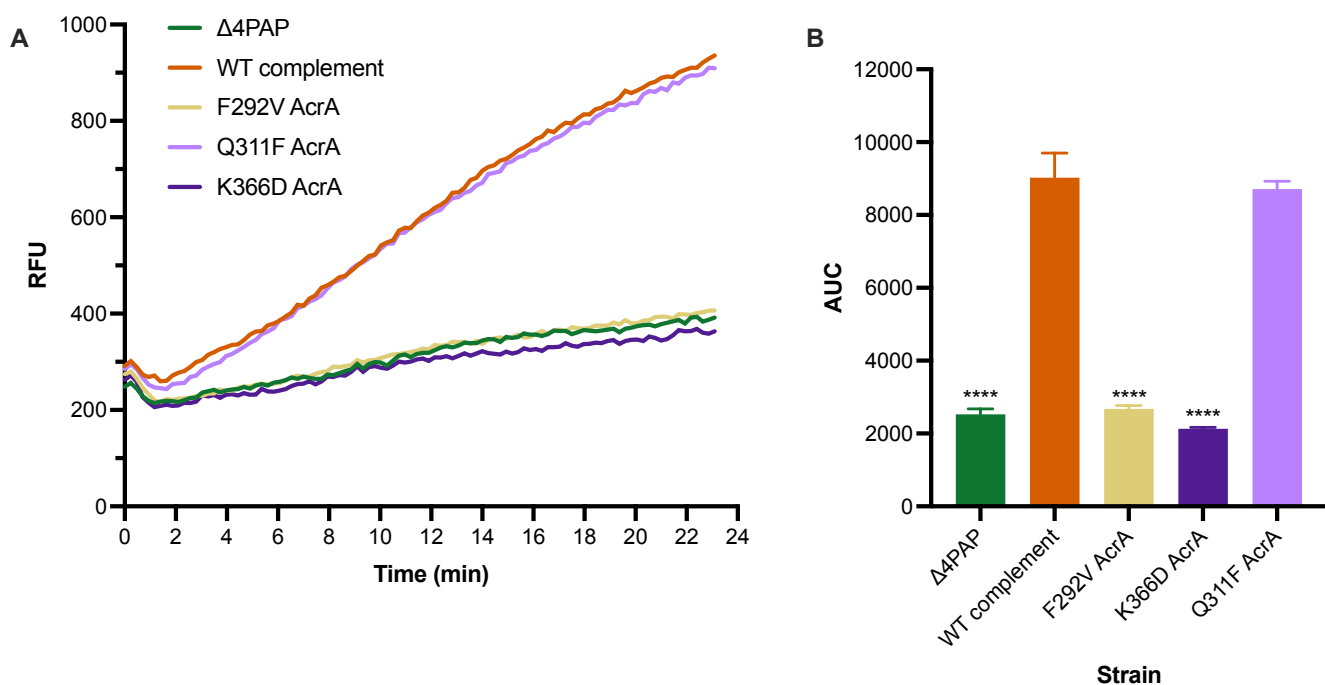

308 **Figure 5. A) Efflux of doxorubicin over time in  $\Delta$ 4PAP strain complemented with**  
309 **mutated versions of AcrA.** Bacteria were treated with doxorubicin and the proton-  
310 motive force dissipater CCCP for one hour and then re-energised with glucose. Efflux  
311 was monitored by increasing RFU due to extracellular doxorubicin. Data presented  
312 are the mean of three biological replicates. **B) Area under curve (AUC) analysis for**  
313 **doxorubicin efflux over time.** Data shown are the mean AUC of the three biological

314 replicates shown in panel A. Data were analysed by one-way ANOVA and compared  
315 to the WT complement using Dunnett's test. Strains with a significantly different AUC  
316 are indicated with \*\*\*\* ( $P \leq 0.0001$ ).

317

318 To further clarify the impact of the K366D mutation on specific channels, we monitored  
319 growth in the presence of efflux-substrates at  $0.25 \times \text{MIC}$  for K366D AcrA, using the  
320 efflux-impaired F292V and phenotypically neutral Q311F as controls. The growth  
321 kinetics data showed that, compared to the WT complement, the K366D AcrA mutant  
322 grew poorly or not at all in the presence of CH2 substrates doxorubicin, erythromycin,  
323 minocycline, and clindamycin (Fig. 6). The K366D AcrA mutant also displayed growth  
324 defects when grown in CH1 substrates, including novobiocin, fusidic acid and  
325 chloramphenicol (Fig. 6). Notably, the K366D AcrA mutant did not have any  
326 observable growth defects when grown in CH3 substrates, such as ethidium bromide  
327 and rhodamine 6G (Fig. 6). This data shows disproportionate impact of the K366D on  
328 substrates utilising CH1 and CH2 (27, 28), while substrates documented to utilise  
329 CH3, such as ethidium bromide and rhodamine 6G (26) appear relatively unaffected.

330



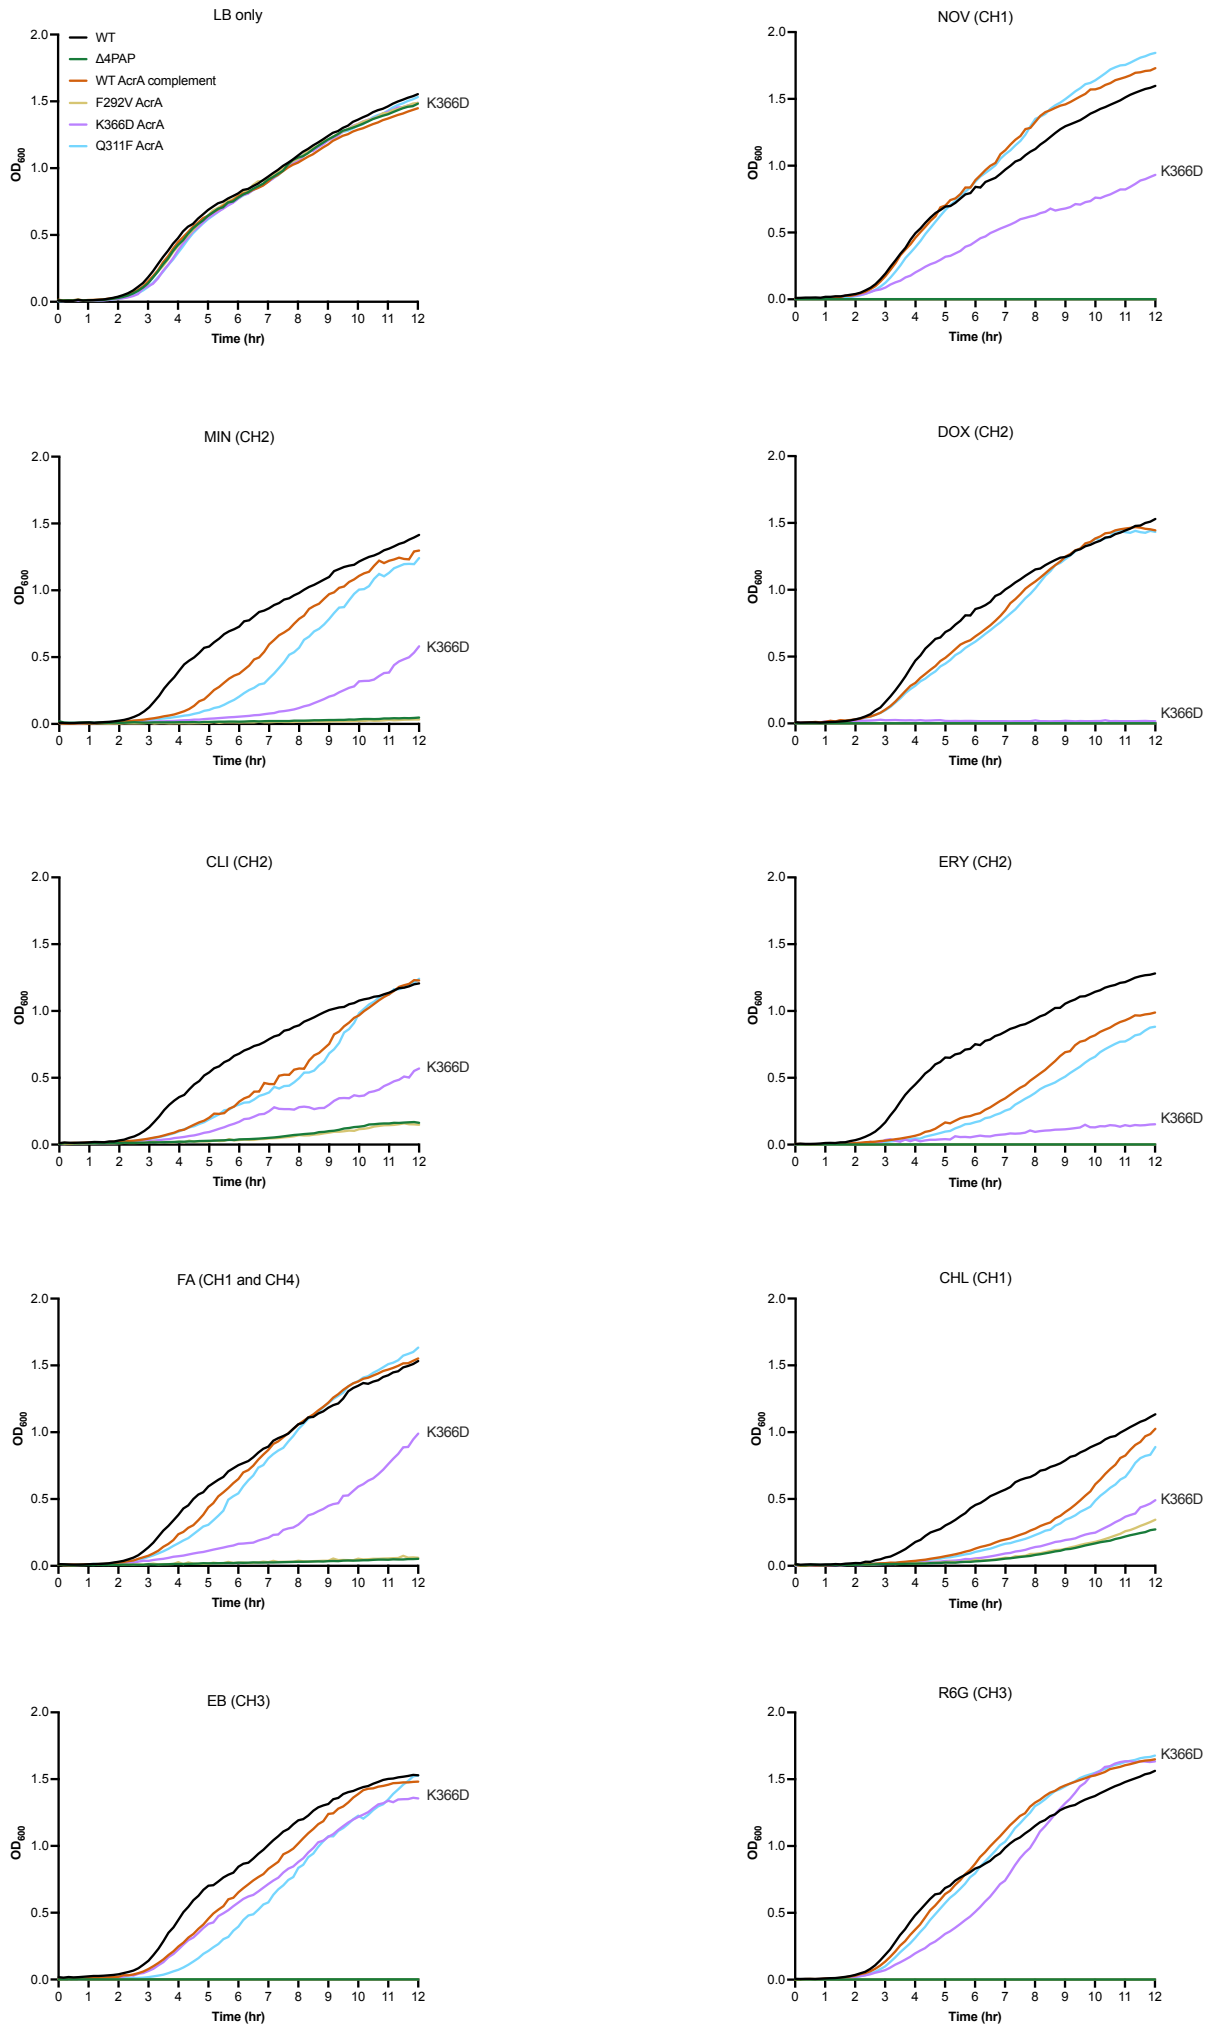

332 **Figure 6. Growth kinetics of  $\Delta$ 4PAP strain complemented with mutated versions**  
333 **of AcrA.** Abbreviations and concentrations of drugs used: CHL, 0.5  $\mu$ g/mL  
334 chloramphenicol; CLI, 8  $\mu$ g/mL clindamycin; DOX, 4  $\mu$ g/mL doxorubicin; EB, 16  $\mu$ g/mL  
335 ethidium bromide; ERY, 4  $\mu$ g/mL erythromycin; FA, 8  $\mu$ g/mL fusidic acid; MIN,  
336 0.25  $\mu$ g/mL minocycline; NOV, 4  $\mu$ g/mL novobiocin; R6G, 16  $\mu$ g/mL rhodamine 6G.  
337 Brackets indicate the preferred channel utilised by the substrate: CH1, channel 1;  
338 CH2, channel 2; CH3, channel 3; CH4, channel 4. Data shown are the mean OD<sub>600</sub>  
339 values of three biological replicates. Concentrations of drugs are 0.25 $\times$ MIC of K366D  
340 AcrA.

341

342 **AcrB mutant with impacted channel 3 function supports the role of K366 in**  
343 **ensuring productive efflux of channel 1 and channel 2 substrates**

344 The above data, combined with the location of the K366D mutation, strongly suggests  
345 that it may affect substrates entering through CH1 and CH2, but not CH3. To further  
346 increase assay sensitivity and avoid interference from substrates that use CH1-3  
347 promiscuously, such as ethidium bromide, we used an AcrB mutant (A33W, T37W,  
348 N298W AcrB) with impacted CH3 function (26), which allows for better separation of  
349 efflux signal arising from CH1 and CH2. An AcrB CH3 mutant (A33W T37W N298W  
350 AcrB), which was previously shown to impact the export of PACs (26). The AcrB CH3  
351 mutant displayed an intermediate level of efflux impairment between that of  $\Delta$ 4PAP  
352  $\Delta$ acrB and the WT *acrAB* complement strain (Fig 7). Furthermore, the AcrB CH3  
353 mutant displayed increased susceptibility to PACs (Table S4) and impaired growth in  
354 the presence of 32  $\mu$ g/mL ethidium bromide (Fig. S2). Importantly, when present in  
355 combination with the AcrB CH3 mutant, the K366D mutation abrogated ethidium  
356 bromide efflux even further, to a level comparable to that of the  $\Delta$ 4PAP  $\Delta$ acrB strain

357 (Fig. 7). Antimicrobial susceptibility testing also showed that the K366D AcrA with the  
358 AcrB CH3 mutation displayed increased susceptibility to substrates compared to the  
359 K366D AcrA or AcrB CH3 mutants alone (Table S4).

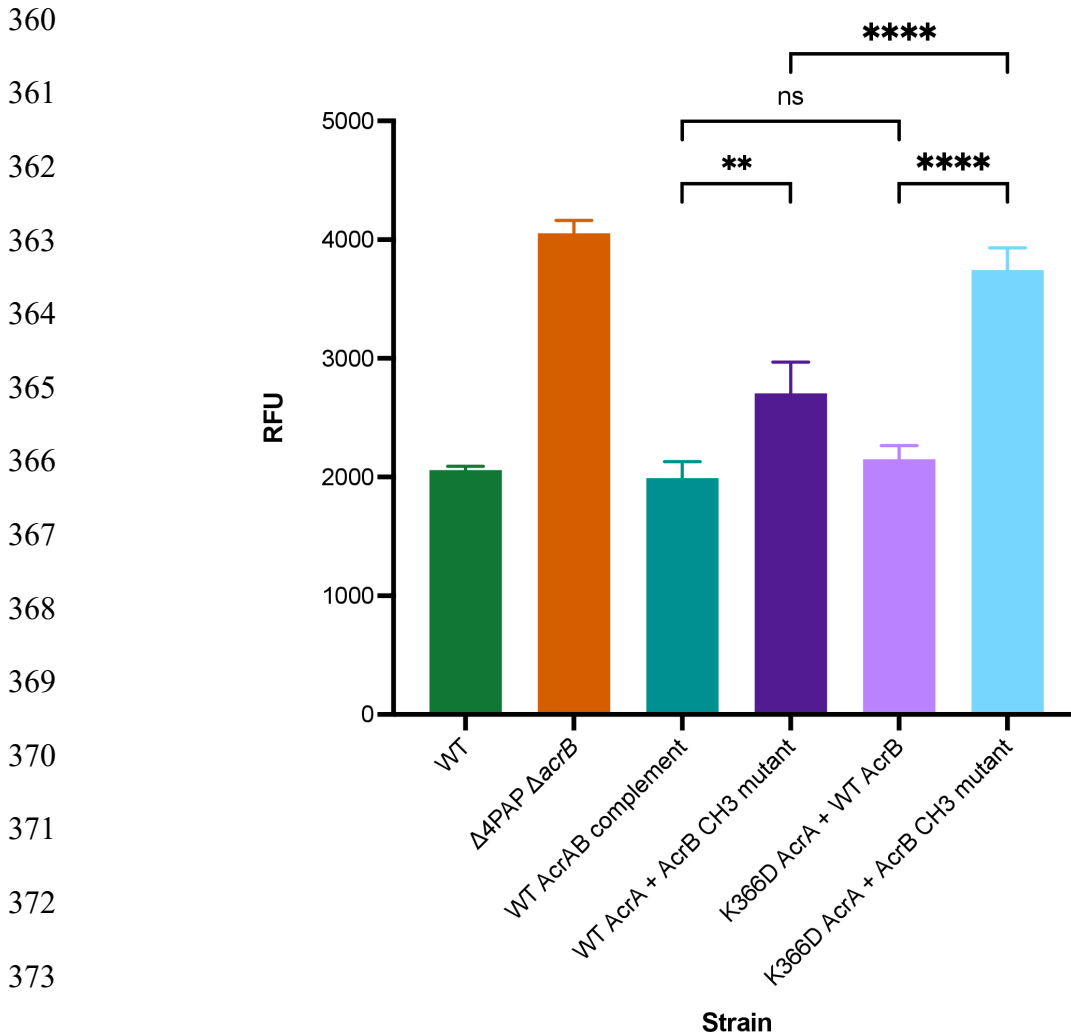

375 **Figure 7. Accumulation of ethidium bromide in Δ4PAP ΔacrB strain**  
376 **complemented with K366D AcrA and the AcrB CH3 mutant (A33W T37W N298W**  
377 **AcrB).** Data shown are the mean of three biological replicates showing maximum RFU  
378 values after 30 minutes of ethidium bromide exposure. Data were analysed by one-  
379 way ANOVA and corrected for multiple comparisons using Tukey's test. Significantly  
380 different strains are indicated with \*\* ( $P \leq 0.01$ ) or \*\*\*\* ( $P \leq 0.0001$ ). ns, not significant.

381

382 Next, the ability of the double mutant (K366D AcrA + AcrB CH3 mutant) to export  
383 doxorubicin was measured. The WT AcrA combined with the AcrB CH3 mutations  
384 showed a similar level of doxorubicin efflux as the WT AcrAB complement, whilst the  
385 K366D AcrA mutation with WT AcrB strain displayed impaired doxorubicin efflux. The  
386 double mutant showed complete impairment of doxorubicin efflux, like that of the  
387  $\Delta 4\text{PAP } \Delta \text{acrB}$  strain (Fig. 8). The doxorubicin efflux assay results were further  
388 validated by growing the K366D AcrA and the AcrB CH3 mutant strains in the presence  
389 of doxorubicin. The double mutant failed to grow in the presence of 2  $\mu\text{g/mL}$   
390 doxorubicin like the  $\Delta 4\text{PAP } \Delta \text{acrB}$  strain. The K366D AcrA mutant with WT AcrB  
391 displayed impaired growth in the presence of 8  $\mu\text{g/mL}$  doxorubicin, whilst the AcrB  
392 CH3 mutant with WT AcrA had no observable growth defect (Fig. S3). The  
393 concentration dependent effect of doxorubicin growth inhibition is consistent with the  
394 blockage of CH2, and gradual saturation of CH1, the function of which is partially  
395 impacted by K366D mutation. Western blotting verified that the phenotypic effects of  
396 the AcrB CH3 mutation were not due to changes in protein expression or stability (Fig.  
397 S1C). In summary, the AcrB CH3 disruption has a clearly pronounced additive effect  
398 compared to K366D acting on its own, consistent with the role of the MPD of the PAP  
399 in the control of CH1 and CH2 substrates. These data further support the essential  
400 role that K366, and the MPD in general play in the transport of CH1 and CH2  
401 substrates.

402

403

404

405

406

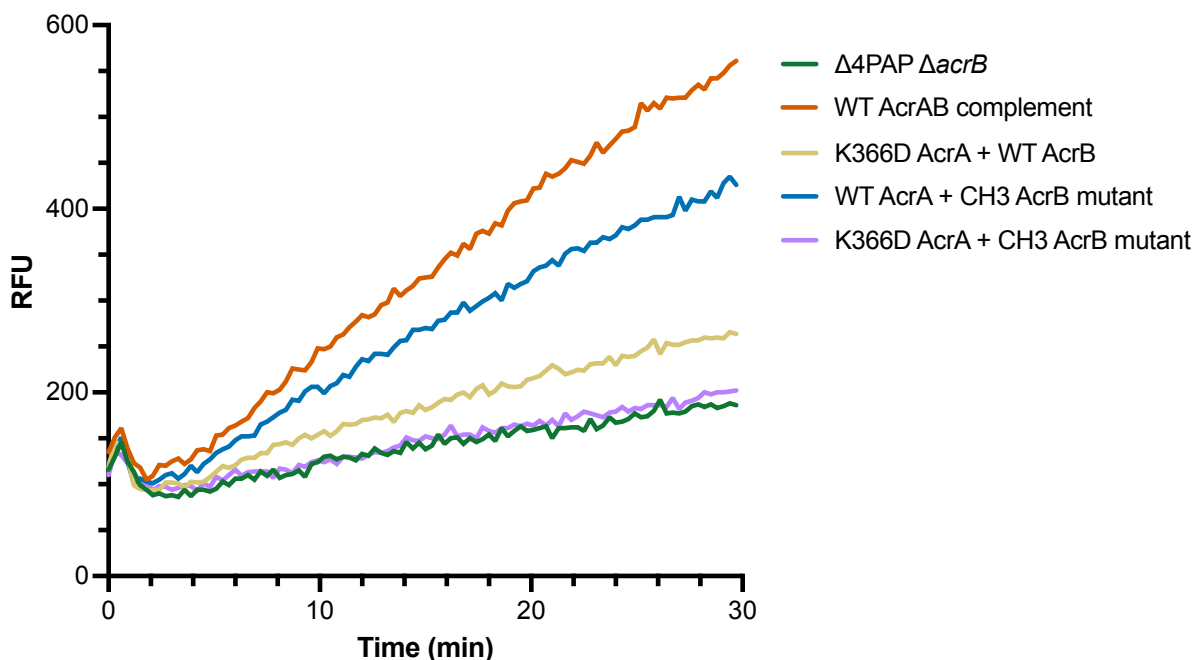

407

408 **Figure 8. The effect of the K366D AcrA and the AcrB channel 3 (CH3) mutation**

409 **on doxorubicin export** Efflux of doxorubicin over time in  $\Delta 4\text{PAP } \Delta\text{acrB}$  strain

410 complemented with K366D AcrA and the AcrB channel 3 (CH3) mutant. Bacteria were

411 treated with doxorubicin and the proton-motive force dissipater CCCP for 1 hour and

412 then re-energised with glucose. Efflux was monitored by increasing RFU due to

413 extracellular doxorubicin. Data presented are the mean of three biological replicates.

414 AcrB CH3 mutant refers to A33W T37W N298W AcrB.

415

416 **K366D also impacts channel 1 substrate transport**

417 Like chloramphenicol, linezolid also uses CH1 (28) and consistent with the

418 interpretation that K366D impacts efflux through this channel, we observed a similar

419 result for linezolid, with clearly pronounced concentration-dependent effect, which is

420 most pronounced at 8  $\mu\text{g/mL}$  and above (Fig. S4). This data suggests that K366 is

421 also somehow involved in either active substrate vetting or surveillance of the

422 substrate-bound state of the transporter, as discussed in detail in the section below.

## 423 Discussion

424 In this study, we set out to refine the previously reported “binding box” model of PAP-  
425 RND interaction (22) by generating and characterising additional subtle and more  
426 conservative PAP mutations. Consistent with the model’s prediction, we report that the  
427 AcrE residues that correspond to the previously identified critical residues in AcrA  
428 conserve their functional significance, as evidenced by targeted mutagenesis.  
429 Furthermore, we have been able to refine the effect of the previous, rather blunt  
430 mutations by separating previously reported double mutant AcrA T270F-T271F into  
431 AcrA T270A, T270D, T271A and T271D, which enabled us to narrow down the T271  
432 as a crucial residue for efflux function. Likewise, the function of F292 also seems to  
433 be critical for efflux function, with even subtle mutations (AcrA F292V) resulting in  
434 complete destabilisation of the AcrAB-ToIC assembly. The R59A mutant, which is in  
435 proximity to G58, resulted in intermediate impairment of efflux function, validating the  
436 previously reported role for box 1, and the PAP  $\beta$ -barrel domain in functional tripartite  
437 pump assembly.

438

439 During the refinement of the binding box 9, which belongs to the membrane-proximal  
440 domain of the PAP, we identified an AcrA mutant (K366D) with a peculiar phenotype.  
441 The K366D mutant had no impact on ethidium bromide efflux or susceptibility to PACs.  
442 However, it had significantly increased susceptibility to HMMDs and LMMDs  
443 compared to WT complement. Structural analysis of the available RND tripartite  
444 assemblies (20, 29, 30) indicated that K366 is in proximity to the proposed entry of the  
445 CH2 (Fig. 4). We hypothesised that if this were indeed the case, as substrates and  
446 drugs exhibit clear channel access preferences, K366D will disproportionately affect  
447 substrates using CH1 and CH2, but not CH3 or CH4. Consistent with this prediction,

448 we observed that the K366D mutant exported doxorubicin, a CH2-substrate, very  
449 poorly. Furthermore, the K366D mutant displayed growth defects in the presence of  
450 several additional CH1-substrates (chloramphenicol, fusidic acid, and linezolid), as  
451 well as CH2-substrates (doxorubicin, erythromycin, and minocycline), but not CH3-  
452 substrates (ethidium bromide and rhodamine 6G).

453

454 Notably, the disruption of CH3 in AcrB had a clearly pronounced additive effect on the  
455 AcrA K366D mutant acting in a WT AcrB background, consistent with the role of the  
456 PAP MPD in the control of CH1 and CH2 access to the respective substrates.  
457 Intriguingly, in addition to the straightforward effect of K366D on the CH2 entry, the  
458 linezolid data presented here suggests that there is also a measurable impact on the  
459 CH1-substrates. This necessarily requires some level of allosteric communication,  
460 because K366 is too far from the proposed entrance of CH1 (26, 27, 41).

461

462 At this stage, the available data doesn't provide a definitive answer as to how the MPD  
463 of the PAP may impact on the apparent substrate preference and selection. However,  
464 the analysis of the available PAP-RND complex structures (20, 29, 30) (Fig. 4),  
465 provides hints to the possible mechanism of the K366 action. One straightforward  
466 possibility, based on the location of K366 near the suggested entry of CH2 (26), and  
467 the flexibility of its side-chain is that it may affect CH2 substrate access and kinetics  
468 by playing the role of a "cap" on the tunnel entrance, possibly sensing, and even  
469 partially coordinating the incoming substrate. However, the effect of K366D also  
470 extends to CH1-substrates, such as linezolid and chloramphenicol, while K366 is  
471 located too far away from the suggested CH1 entry points to be directly involved in  
472 any active substrate vetting. Thus, it is tempting to suggest that the K366, and the

473 MPD as a whole may be involved in a more generalised sensing of the substrate  
474 occupied state of the PBP (which is the convergence of CH1 and CH2) (27, 41), and/or  
475 the potential propagating of the “substrate-occupied” signal upwards *via*  
476 conformational change in the PAP leading to TolC engagement and channel opening  
477 as previously suggested (8). Strikingly, this interpretation is directly supported by the  
478 very recent *in situ* cryo-electron tomography structure of the assembled AcrAB-TolC  
479 pump (42), which displays strong and differential association of the MPDs of PAP  
480 protomers I and II with the PC1 and PN1/PC2 domains of AcrB respectively, with the  
481 latter in particular suggested to be associated with sensing the MBX3132 drug-  
482 occupied state of the transporter, and providing a conformational signal to TolC,  
483 affecting its channel gating. Additionally, for the first time, the *in-situ* structure also  
484 unambiguously identifies the location of the C-terminal helices and the membrane-  
485 associated N-terminal tails of AcrA (42), that appear to occupy a crevasse on the AcrB-  
486 surface that may also plausibly account for CH1 effects reported here, possibly  
487 providing additional sensory/allosteric input. Such sensory input may be allosterically  
488 conveyed to engagement of the OMF partner protein during the initial assembly of the  
489 tripartite complex, or possibly provide directionality of the L-T-O transition during the  
490 efflux cycle, which is compatible with the mechanistic model of RND pump cycling  
491 suggested recently (8).

492

493

494

495

496

497



## 498 **Materials and methods**

### 499 **Bacterial strains and growth conditions**

500 All strains were derived from *Salmonella enterica* serovar Typhimurium strain SL1344  
501 (henceforth referred to as *S. Typhimurium*), a pathogenic strain first isolated from an  
502 experimentally infected calf (43). All strains were grown in LB broth at 37°C with  
503 aeration.

504

### 505 **Growth kinetic assays**

506 Overnight cultures (~10<sup>9</sup> cfu/mL) of test strains were diluted to a starting inoculum of  
507 10<sup>6</sup> cfu/mL in a 96-well plate. Where appropriate, the test strains were diluted in LB  
508 broth supplemented with antibiotics. Growth was monitored over 12 hr in a FLUOstar  
509 OMEGA plate reader (BMG Labtech, Germany).

510

### 511 **Site directed mutagenesis**

512 Mutations in *AcrA* was generated using the plasmid *pacrA* (pET-20b (+) carrying the  
513 *acrA* gene from *S. Typhimurium* SL1334 with C-terminal 6xHis-tag). Mutations in both  
514 *AcrA* and *AcrB* was generated using the plasmid *pacrAB* (pET-20b (+) carrying the  
515 *acrAB* operon from *S. Typhimurium* SL1334 with a C-terminal 6xHis-tag). Mutations in  
516 *AcrE* were generated using the plasmid *pacrE* (pTrcHis2-TOPO carrying the *acrE*  
517 gene from *S. Typhimurium* SL1334 with a C-terminal 6xHis-tag). All site-directed  
518 mutagenesis (SDM) reactions were carried out using the QuikChange Lightning SDM  
519 Kit (Agilent, USA). The mutations were verified by sequencing (Eurofins Genomics,  
520 UK). Primers used for all the SDM reactions are listed in Table S1.

521

### 522 **Ethidium bromide accumulation and efflux assay**

523 The efflux activity of strains was assessed by measuring ethidium bromide  
524 accumulation and efflux as previously described (44).

525

### 526 **Doxorubicin efflux assay**

527 Doxorubicin efflux was measured in a similar manner to ethidium bromide efflux, with  
528 some changes. Cells were grown to an OD<sub>600</sub> of 0.6 and washed with efflux buffer (20  
529 mM potassium phosphate buffer with 5 mM magnesium chloride) three times. Carbonyl  
530 cyanide *m*-chlorophenylhydrazone (CCCP) and doxorubicin were added at a final  
531 concentration of 100 µM and 20 µM, respectively. Cells were incubated at 37°C with  
532 aeration for 1 hour. Following incubation, cells were washed with efflux buffer three  
533 times. Cells were energised with 25 mM glucose and doxorubicin efflux was measured  
534 over 30 min at excitation and emission wavelengths of 485 and 620-10 nm,  
535 respectively.

536

### 537 **Antimicrobial susceptibility**

538 The agar doubling dilution method was used to determine the minimum inhibitory  
539 concentrations (MICs) of various antimicrobials and dyes according to Clinical and  
540 Laboratory Standards Institute guidance (45). All MICs were repeated at least three  
541 times.

542

### 543 **Western blotting**

544 Wild-type and mutant AcrA were expressed in SL1344 Δ4PAP from *pacrA* plasmids.  
545 Wild-type and mutant AcrE were expressed in SL1344 Δ4PAP Δ*acrF* from *pacrE*  
546 plasmids. Wild-type and mutant AcrB were expressed in SL1344 Δ4PAP Δ*acrB* from  
547 *pacrAB* plasmids. Cultures were grown to an OD<sub>600</sub> of 0.4 without induction. Cells were

548 harvested and lysed in 10 mM Tris-HCl, 1 mM disodium EDTA, pH 8.0, supplemented  
549 with complete EDTA-Free Protease Inhibitor tablets (Roche, Switzerland) and  
550 100 µg/mL lysozyme using sonication. Membrane fractions were harvested, separated  
551 using a 12% SDS-PAGE gel for AcrA and AcrE and 8% SDS-PAGE gel for AcrB, and  
552 transferred to a PVDF membrane. The His-tagged proteins were blotted using anti-6x  
553 His tag HRP-conjugated monoclonal antibody (Invitrogen, USA) and detected using  
554 Clarity Western ECL Substrate (Bio-Rad, USA) on an Amersham 680 Imager (Cytiva,  
555 USA).

556

### 557 **Molecular visualisation of substrate channels**

558 The location of the substrate channels 1-3 within the RND-transporter AcrB were  
559 calculated using CAVER software v3.0 (46) as described previously (26). For  
560 visualisation of the recently reported channel 4, we used the CAVER-output kindly  
561 provided by K. M. Pos (personal communication), as reported in Tam et al. (28).  
562 PyMOL (Molecular Graphics System, Version 2.0 Schrödinger, LLC.) was used for 3D  
563 rendering of molecular structures and the substrate channels discussed.

564

### 565 **Statistical analysis**

566 Experiments were carried out at least three times on separate occasions. Data shown  
567 are the mean of at least three biological replicates, and where shown, error bars  
568 indicate standard deviations. All statistical comparisons were performed using one-  
569 way ANOVA with multiple comparisons in GraphPad Prism 9.2 software (GraphPad  
570 Software LLC).

571

572

573 **Acknowledgements**

574 I.A. was funded by the Midlands Integrative Biosciences Training Partnership  
575 (MIBTP2) and grant BBSRC BB/M01116X/1 at the University of Birmingham. V.N.B.  
576 was supported by funding from BBSRC (grant BB/N002776/1). J.M.A.B. was funded  
577 by the BBSRC grant BB/M02623X/1 (David Phillips Fellowship to J.M.A.B).

578

579 **References**

580

- 581 1. Ventola CL. 2015. The antibiotic resistance crisis: part 1: causes and threats.  
582 P T 40:277-83.
- 583 2. Blair JM, Webber MA, Baylay AJ, Ogbolu DO, Piddock LJ. 2015. Molecular  
584 mechanisms of antibiotic resistance. *Nat Rev Microbiol* 13:42-51.
- 585 3. Du D, Wang-Kan X, Neuberger A, van Veen HW, Pos KM, Piddock LJV, Luisi  
586 BF. 2018. Multidrug efflux pumps: structure, function and regulation. *Nat Rev*  
587 *Microbiol* 16:523-539.
- 588 4. Colclough AL, Alav I, Whittle EE, Pugh HL, Darby EM, Legood SW, McNeil HE,  
589 Blair JM. 2020. RND efflux pumps in Gram-negative bacteria; regulation,  
590 structure and role in antibiotic resistance. *Future Microbiol* 15:143-157.
- 591 5. Li XZ, Plesiat P, Nikaido H. 2015. The challenge of efflux-mediated antibiotic  
592 resistance in Gram-negative bacteria. *Clin Microbiol Rev* 28:337-418.
- 593 6. Zwama M, Nishino K. 2021. Ever-Adapting RND Efflux Pumps in Gram-  
594 Negative Multidrug-Resistant Pathogens: A Race against Time. *Antibiotics*  
595 (Basel) 10.
- 596 7. Neuberger A, Du D, Luisi BF. 2018. Structure and mechanism of bacterial  
597 tripartite efflux pumps. *Res Microbiol* 169:401-413.

- 598 8. Alav I, Kobyłka J, Kuth MS, Pos KM, Picard M, Blair JMA, Bavro VN. 2021.  
599 Structure, Assembly, and Function of Tripartite Efflux and Type 1 Secretion  
600 Systems in Gram-Negative Bacteria. *Chemical Reviews* 121:5479-5596.
- 601 9. Nishino K, Yamaguchi A. 2001. Analysis of a complete library of putative drug  
602 transporter genes in *Escherichia coli*. *J Bacteriol* 183:5803-12.
- 603 10. Nishino K, Latifi T, Groisman EA. 2006. Virulence and drug resistance roles of  
604 multidrug efflux systems of *Salmonella enterica* serovar Typhimurium. *Mol*  
605 *Microbiol* 59:126-41.
- 606 11. Zhang Y, Xiao M, Horiyama T, Zhang Y, Li X, Nishino K, Yan A. 2011. The  
607 multidrug efflux pump MdtEF protects against nitrosative damage during the  
608 anaerobic respiration in *Escherichia coli*. *J Biol Chem* 286:26576-84.
- 609 12. Horiyama T, Nishino K. 2014. AcrB, AcrD, and MdtABC multidrug efflux  
610 systems are involved in enterobactin export in *Escherichia coli*. *PLoS One*  
611 9:e108642.
- 612 13. Buckner MM, Blair JM, La Ragione RM, Newcombe J, Dwyer DJ, Ivens A,  
613 Piddock LJ. 2016. Beyond Antimicrobial Resistance: Evidence for a Distinct  
614 Role of the AcrD Efflux Pump in *Salmonella* Biology. *mBio* 7.
- 615 14. Wang-Kan X, Blair JMA, Chirullo B, Betts J, La Ragione RM, Ivens A, Ricci V,  
616 Opperman TJ, Piddock LJV. 2017. Lack of AcrB Efflux Function Confers Loss  
617 of Virulence on *Salmonella enterica* Serovar Typhimurium. *mBio* 8.
- 618 15. Wang-Kan X, Rodriguez-Blanco G, Southam AD, Winder CL, Dunn WB, Ivens  
619 A, Piddock LJV. 2021. Metabolomics Reveal Potential Natural Substrates of  
620 AcrB in *Escherichia coli* and *Salmonella enterica* Serovar Typhimurium. *mBio*  
621 12.

- 622 16. Schaffner SH, Lee AV, Pham MTN, Kassaye BB, Li H, Tallada S, Lis C, Lang  
623 M, Liu Y, Ahmed N, Galbraith LG, Moore JP, Bischof KM, Menke CC,  
624 Slonczewski JL. 2021. Extreme Acid Modulates Fitness Trade-Offs of Multidrug  
625 Efflux Pumps MdtEF-TolC and AcrAB-TolC in *Escherichia coli* K-12. *Appl*  
626 *Environ Microbiol* 87:e0072421.
- 627 17. Nishino K, Hayashi-Nishino M, Yamaguchi A. 2009. H-NS modulates multidrug  
628 resistance of *Salmonella enterica* serovar Typhimurium by repressing multidrug  
629 efflux genes *acrEF*. *Antimicrob Agents Chemother* 53:3541-3.
- 630 18. Symmons MF, Marshall RL, Bavro VN. 2015. Architecture and roles of  
631 periplasmic adaptor proteins in tripartite efflux assemblies. *Front Microbiol*  
632 6:513.
- 633 19. Du D, Wang Z, James NR, Voss JE, Klimont E, Ohene-Agyei T, Venter H, Chiu  
634 W, Luisi BF. 2014. Structure of the AcrAB-TolC multidrug efflux pump. *Nature*  
635 509:512-5.
- 636 20. Wang Z, Fan G, Hryc CF, Blaza JN, Serysheva, II, Schmid MF, Chiu W, Luisi  
637 BF, Du D. 2017. An allosteric transport mechanism for the AcrAB-TolC  
638 multidrug efflux pump. *Elife* 6.
- 639 21. Ge Q, Yamada Y, Zgurskaya H. 2009. The C-terminal domain of AcrA is  
640 essential for the assembly and function of the multidrug efflux pump AcrAB-  
641 TolC. *J Bacteriol* 191:4365-71.
- 642 22. McNeil HE, Alav I, Torres RC, Rossiter AE, Laycock E, Legood S, Kaur I,  
643 Davies M, Wand M, Webber MA, Bavro VN, Blair JMA. 2019. Identification of  
644 binding residues between periplasmic adapter protein (PAP) and RND efflux  
645 pumps explains PAP-pump promiscuity and roles in antimicrobial resistance.  
646 *PLoS Pathog* 15:e1008101.

- 647 23. De Angelis F, Lee JK, O'Connell JD, 3rd, Miercke LJ, Verschueren KH,  
648 Srinivasan V, Bauvois C, Govaerts C, Robbins RA, Ruyschaert JM, Stroud  
649 RM, Vandebussche G. 2010. Metal-induced conformational changes in ZneB  
650 suggest an active role of membrane fusion proteins in efflux resistance  
651 systems. *Proc Natl Acad Sci U S A* 107:11038-43.
- 652 24. Chacon KN, Mealman TD, McEvoy MM, Blackburn NJ. 2014. Tracking metal  
653 ions through a Cu/Ag efflux pump assigns the functional roles of the periplasmic  
654 proteins. *Proc Natl Acad Sci U S A* 111:15373-8.
- 655 25. Lu S, Zgurskaya HI. 2013. MacA, a periplasmic membrane fusion protein of the  
656 macrolide transporter MacAB-TolC, binds lipopolysaccharide core specifically  
657 and with high affinity. *J Bacteriol* 195:4865-72.
- 658 26. Zwama M, Yamasaki S, Nakashima R, Sakurai K, Nishino K, Yamaguchi A.  
659 2018. Multiple entry pathways within the efflux transporter AcrB contribute to  
660 multidrug recognition. *Nat Commun* 9:124.
- 661 27. Nakashima R, Sakurai K, Yamasaki S, Nishino K, Yamaguchi A. 2011.  
662 Structures of the multidrug exporter AcrB reveal a proximal multisite drug-  
663 binding pocket. *Nature* 480:565-9.
- 664 28. Tam HK, Foong WE, Oswald C, Herrmann A, Zeng H, Pos KM. 2021. Allosteric  
665 drug transport mechanism of multidrug transporter AcrB. *Nat Commun*  
666 12:3889.
- 667 29. Glavier M, Puvanendran D, Salvador D, Decossas M, Phan G, Garnier C,  
668 Frezza E, Cece Q, Schoehn G, Picard M, Taveau JC, Daury L, Broutin I,  
669 Lambert O. 2020. Antibiotic export by MexB multidrug efflux transporter is  
670 allosterically controlled by a MexA-OprM chaperone-like complex. *Nat*  
671 *Commun* 11:4948.

- 672 30. Tsutsumi K, Yonehara R, Ishizaka-Ikeda E, Miyazaki N, Maeda S, Iwasaki K,  
673 Nakagawa A, Yamashita E. 2019. Structures of the wild-type MexAB-OprM  
674 tripartite pump reveal its complex formation and drug efflux mechanism. *Nat*  
675 *Commun* 10:1520.
- 676 31. Mikolosko J, Bobyk K, Zgurskaya HI, Ghosh P. 2006. Conformational flexibility  
677 in the multidrug efflux system protein AcrA. *Structure* 14:577-87.
- 678 32. Alav I, Bavro VN, Blair JMA. 2021. Interchangeability of periplasmic adaptor  
679 proteins AcrA and AcrE in forming functional efflux pumps with AcrD in  
680 *Salmonella enterica* serovar Typhimurium. *J Antimicrob Chemother* 76:2558-  
681 2564.
- 682 33. Elkins CA, Nikaido H. 2003. Chimeric analysis of AcrA function reveals the  
683 importance of its C-terminal domain in its interaction with the AcrB multidrug  
684 efflux pump. *J Bacteriol* 185:5349-56.
- 685 34. Robert X, Gouet P. 2014. Deciphering key features in protein structures with  
686 the new ENDscript server. *Nucleic Acids Res* 42:W320-4.
- 687 35. Schuster S, Vavra M, Kern WV. 2016. Evidence of a Substrate-Discriminating  
688 Entrance Channel in the Lower Porter Domain of the Multidrug Resistance  
689 Efflux Pump AcrB. *Antimicrob Agents Chemother* 60:4315-23.
- 690 36. Murakami S, Nakashima R, Yamashita E, Yamaguchi A. 2002. Crystal structure  
691 of bacterial multidrug efflux transporter AcrB. *Nature* 419:587-93.
- 692 37. Murakami S, Nakashima R, Yamashita E, Matsumoto T, Yamaguchi A. 2006.  
693 Crystal structures of a multidrug transporter reveal a functionally rotating  
694 mechanism. *Nature* 443:173-9.
- 695 38. Zwama M, Yamaguchi A. 2018. Molecular mechanisms of AcrB-mediated  
696 multidrug export. *Res Microbiol* 169:372-383.



- 697 39. Daury L, Orange F, Taveau JC, Verchere A, Monlezun L, Gounou C, Marreddy  
698 RK, Picard M, Broutin I, Pos KM, Lambert O. 2016. Tripartite assembly of RND  
699 multidrug efflux pumps. *Nat Commun* 7:10731.
- 700 40. Tam HK, Malviya VN, Foong WE, Herrmann A, Malloci G, Ruggerone P, Vargiu  
701 AV, Pos KM. 2020. Binding and Transport of Carboxylated Drugs by the  
702 Multidrug Transporter AcrB. *J Mol Biol* 432:861-877.
- 703 41. Sennhauser G, Amstutz P, Briand C, Storchenegger O, Grutter MG. 2007. Drug  
704 export pathway of multidrug exporter AcrB revealed by DARPin inhibitors. *PLoS*  
705 *Biol* 5:e7.
- 706 42. Chen M, Shi X, Yu Z, Fan G, Serysheva, II, Baker ML, Luisi BF, Ludtke SJ,  
707 Wang Z. 2021. In situ structure of the AcrAB-TolC efflux pump at subnanometer  
708 resolution. *Structure* doi:10.1016/j.str.2021.08.008.
- 709 43. Wray C, Sojka WJ. 1978. Experimental *Salmonella typhimurium* infection in  
710 calves. *Res Vet Sci* 25:139-43.
- 711 44. Smith HE, Blair JM. 2014. Redundancy in the periplasmic adaptor proteins AcrA  
712 and AcrE provides resilience and an ability to export substrates of multidrug  
713 efflux. *J Antimicrob Chemother* 69:982-7.
- 714 45. CLSI. 2020. Performance standards for antimicrobial susceptibility testing, 30th  
715 edition, 30th ed, vol 40. Clinical and Laboratory Standards Institute Wayne, PA.
- 716 46. Brezovsky J, Kozlikova B, Damborsky J. 2018. Computational Analysis of  
717 Protein Tunnels and Channels. *Methods Mol Biol* 1685:25-42.
- 718
